# Supplementary material
Source: Springer Nature journal article supplement (https://www.springermedizin.de/resource/supplementary/12891_2006_349_MOESM1_ESM.pdf/9511118)

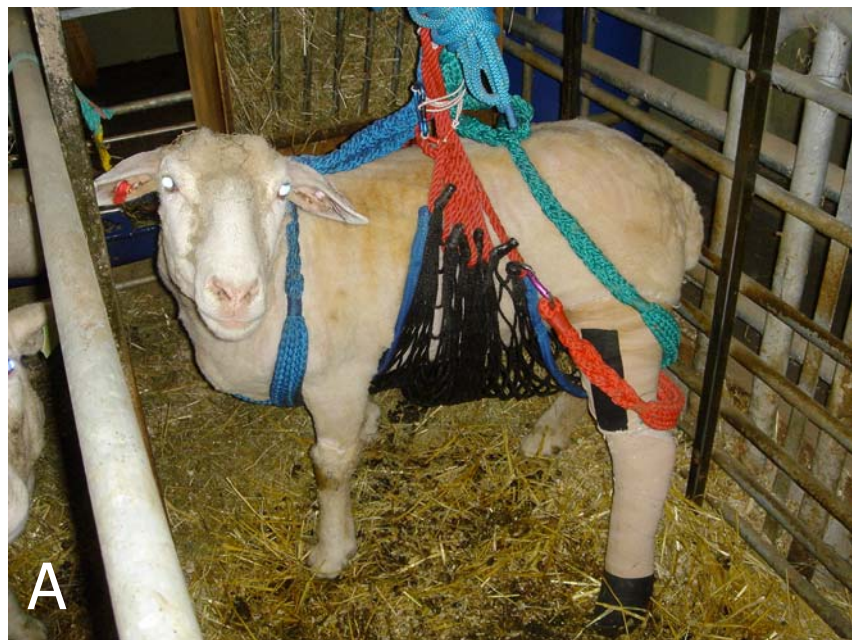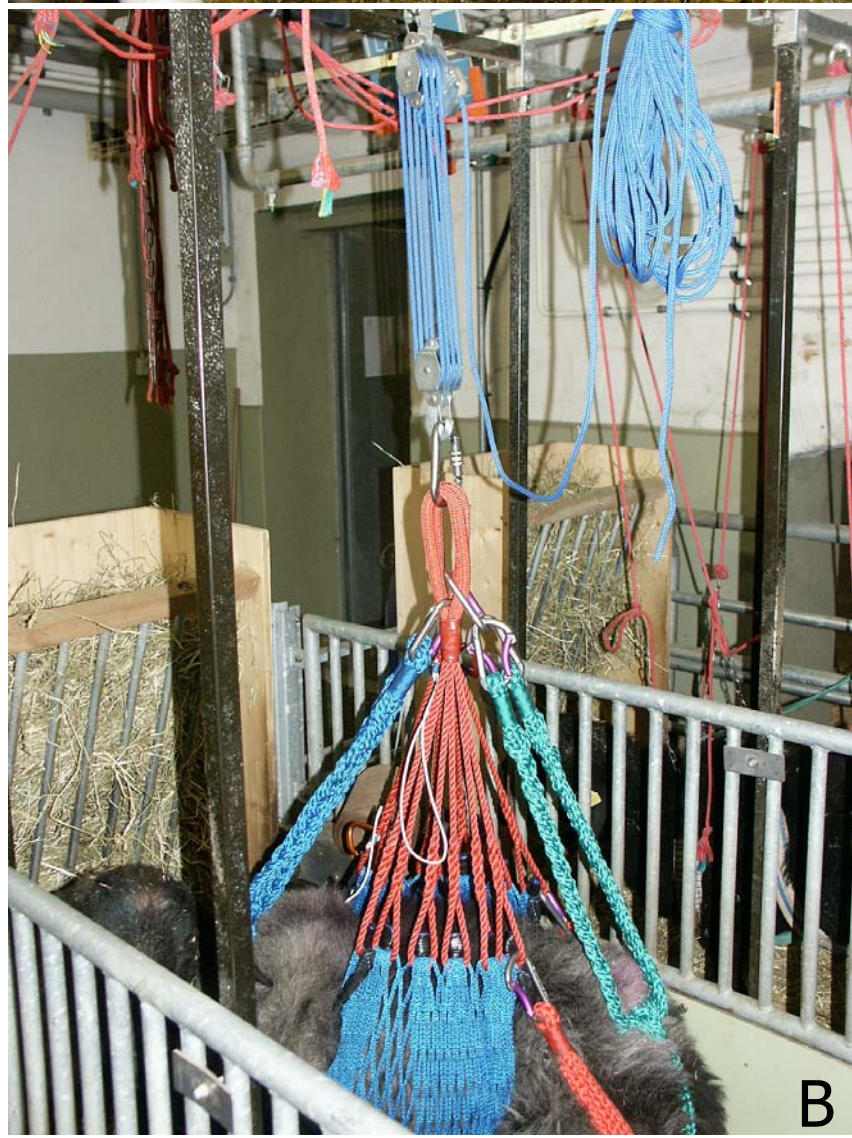

Supplement: MOESM1 [file 9511118]
